# Supplementary material
Source: PubMed Central journal article supplement (PMC4094037)

## Supplementary:

Figure S1: Nucleotide sequence of cDNA encoding HisRS<sup>WHEP</sup> and comparison to reported EST#BP267368.

(A) Trace of sequence read covering the new cassette exon, exon 2B, in the HisRS<sup>WHEP</sup> SV. (B) Sequence alignment of cDNA sequence of HisRS<sup>WHEP</sup> with coding sequences of EST#BP267368 and *HARS* from the 3'-end of exon1 to the 5'-end of exon3, and including exon 2B. Note that two apparent variants/errors appear in the sequence of EST#BP267368. One is a non-synonymous T>C mutation in exon 2 would cause a Leu56Pro substitution, and the other is a synonymous A>G change in exon 3. A synonymous T>A mutation in HisRS<sup>WHEP</sup> is also present in exon 2B. (C) Alignment of the amino acid sequences of EST#BP267368 and HisRS<sup>WHEP</sup>.

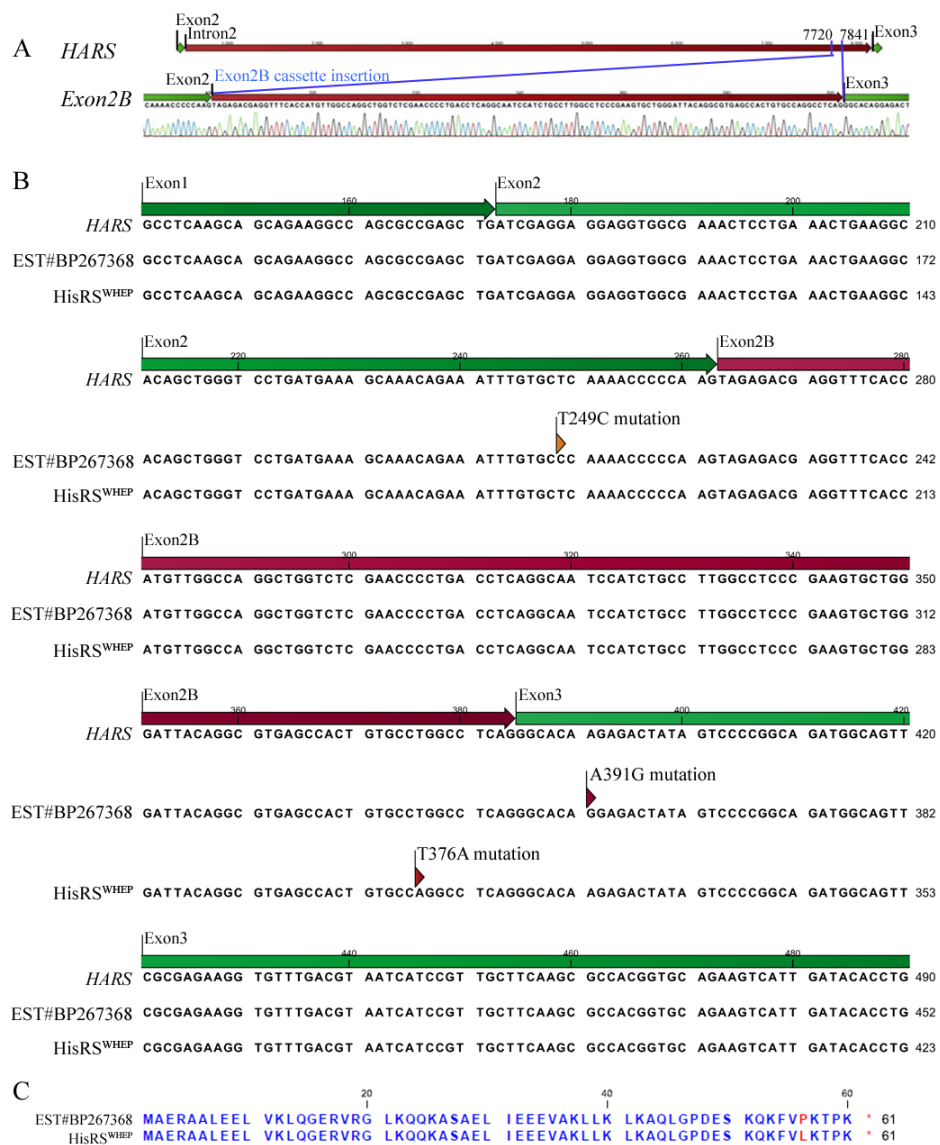

Supplement: supp_C114.571026_jbc.C114.571026-1.pdf [file supp_C114.571026_jbc.C114.571026-1.pdf]
